# Supplementary figures and images for: Linkage Disequilibrium in Wild Mice
Source: PLOS journal article supplement (doi:10.1371/journal.pgen.0030144), 2007-08-20

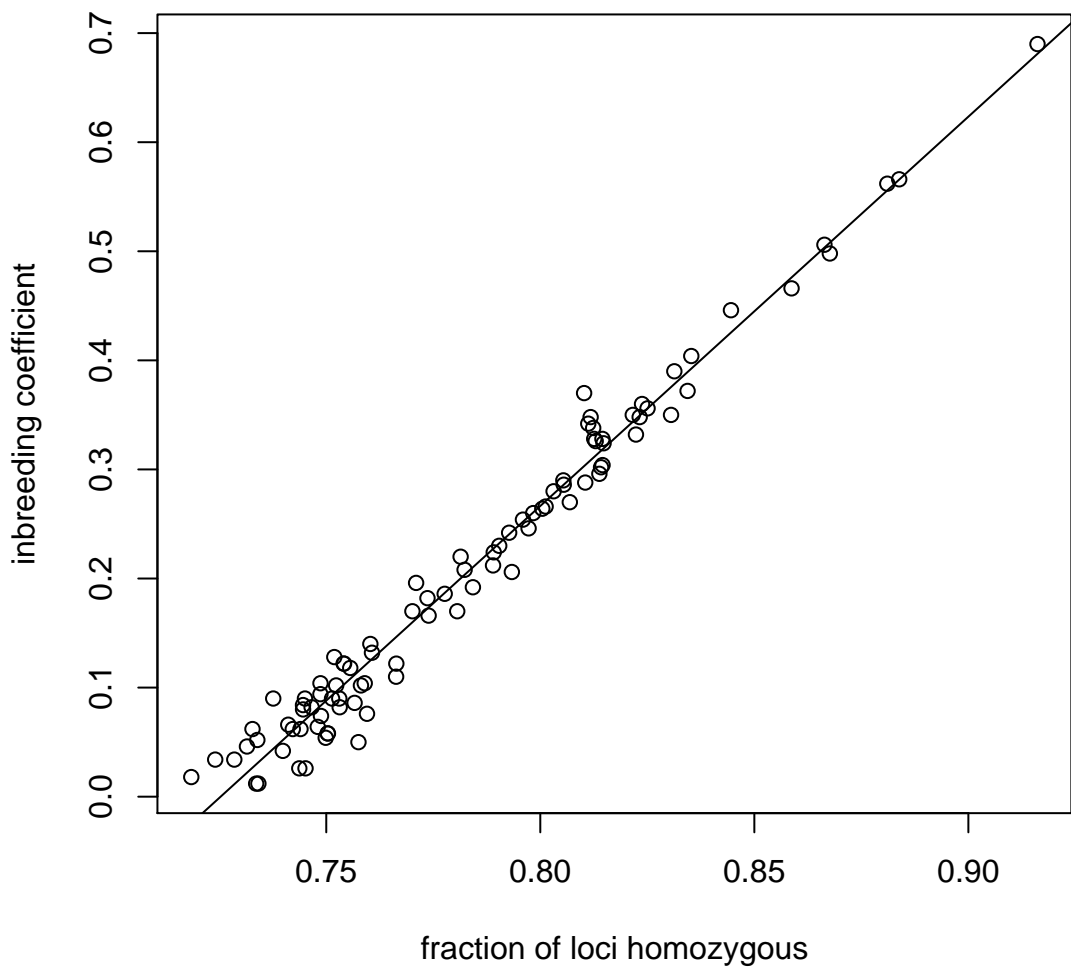

Supplement: S3 (10.1371/journal.pgen.0030144.s003) [file journal.pgen.0030144.s003]

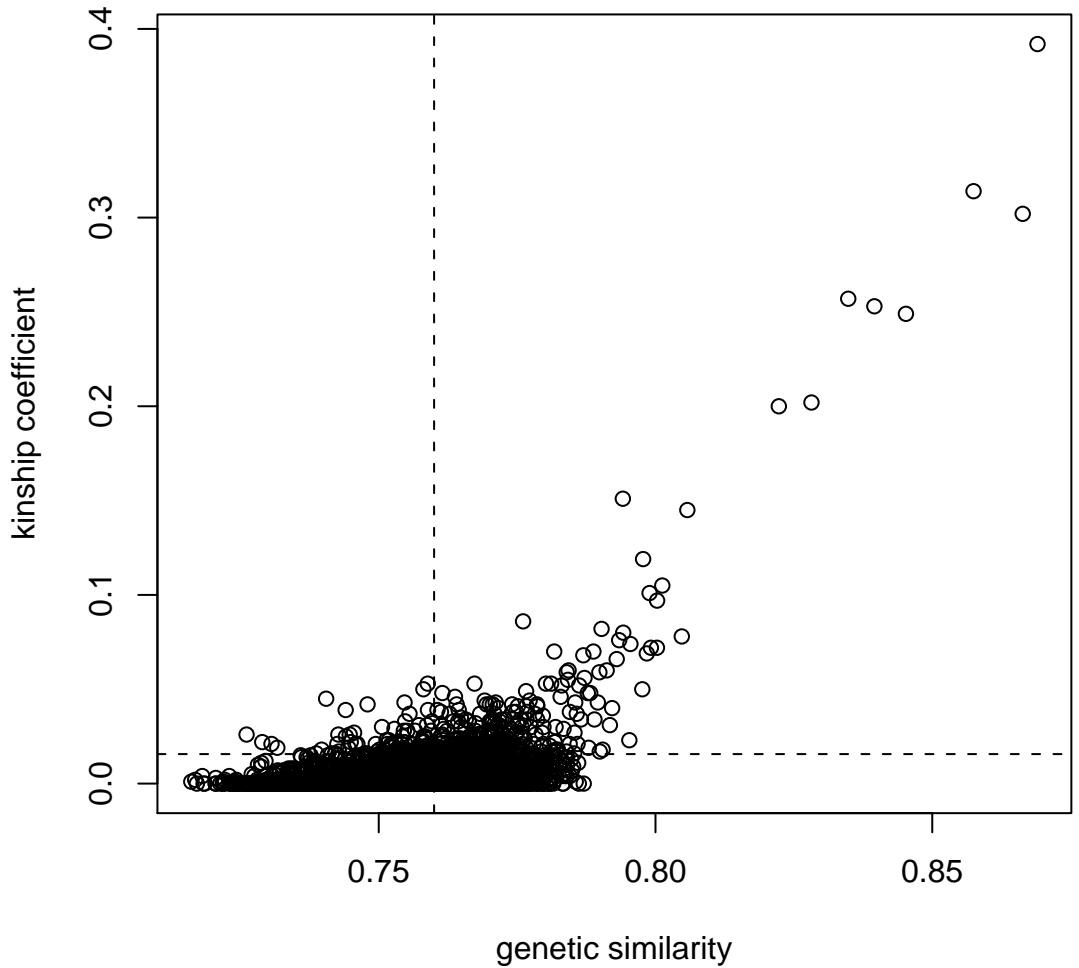

Supplement: S4 (10.1371/journal.pgen.0030144.s004) [file journal.pgen.0030144.s004]

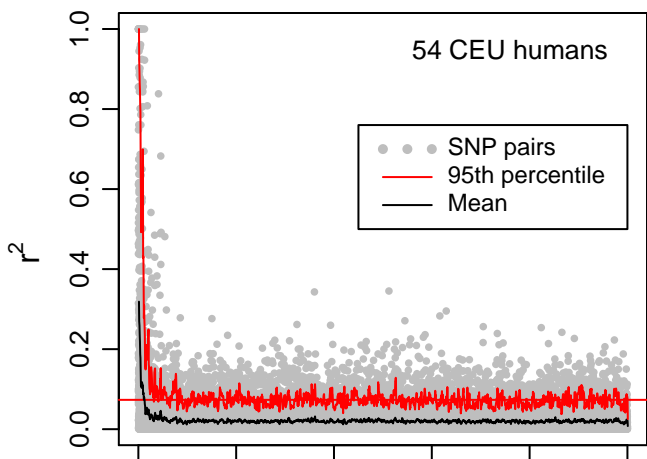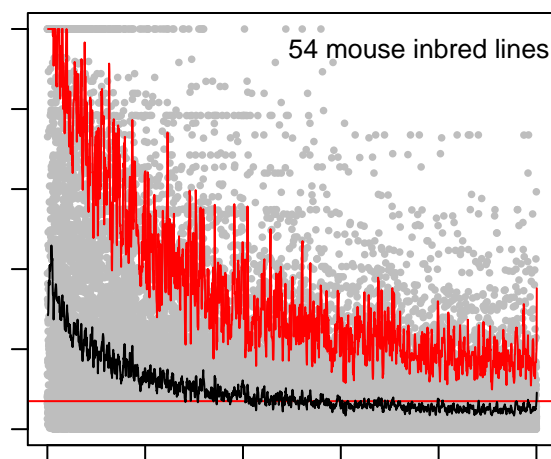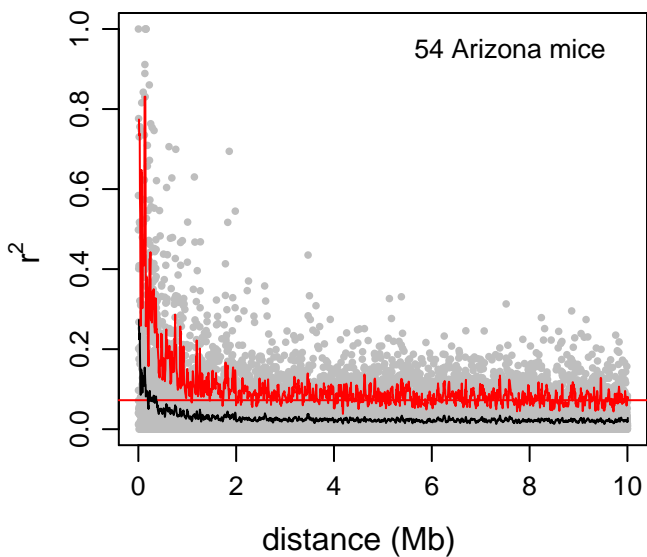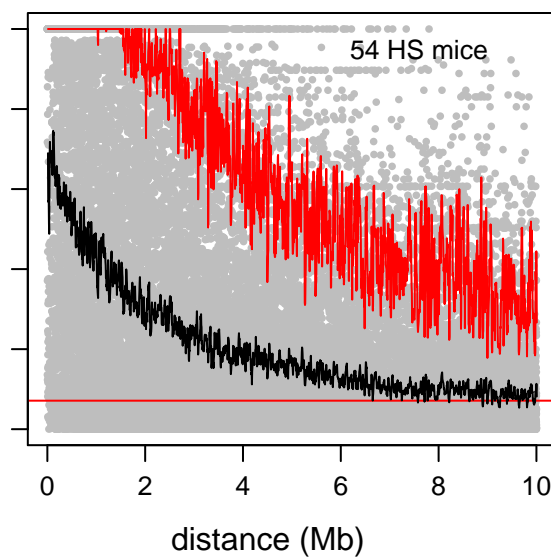

Supplement: S5 (10.1371/journal.pgen.0030144.s005) [file journal.pgen.0030144.s005]
